# Supplementary material
Source: PubMed Central journal article supplement (PMC2291084)

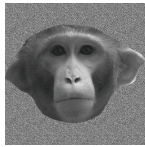

V

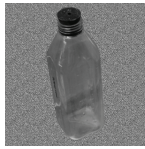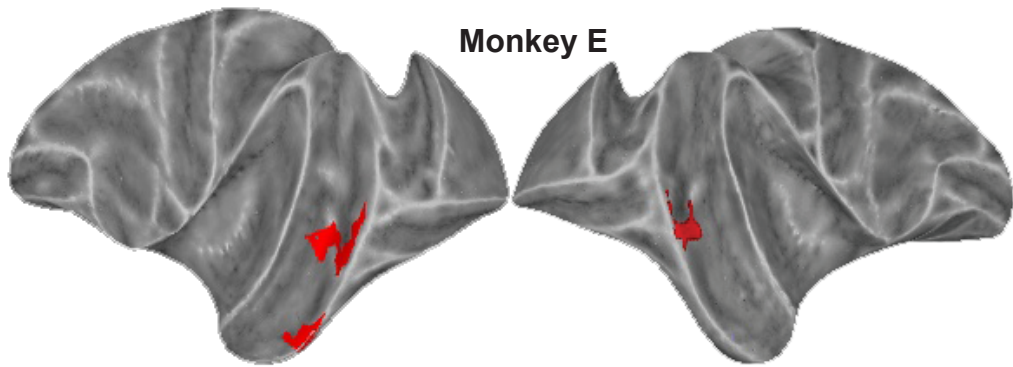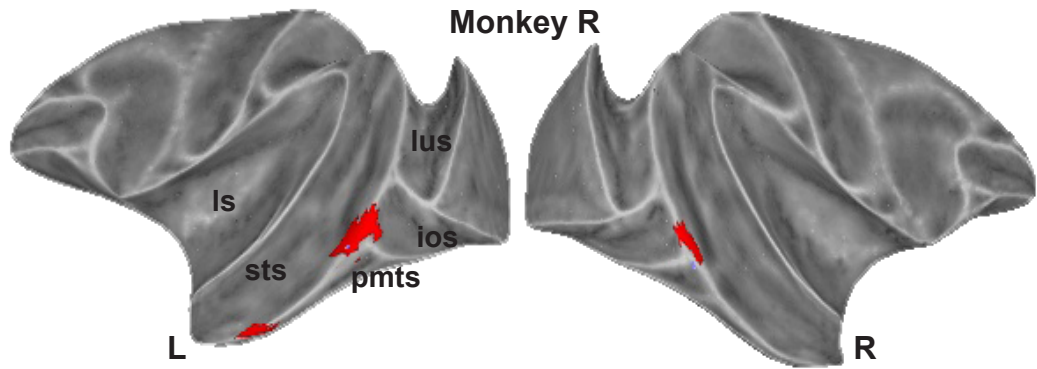

Supplement: pnas_0800489105_1.pdf [file pnas_0800489105_1.pdf]

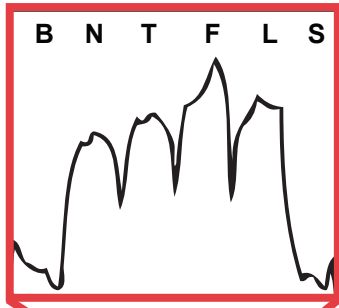

Monkey E

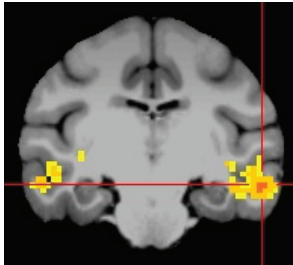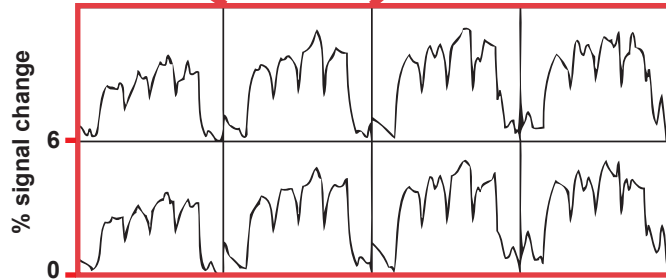

Monkey R

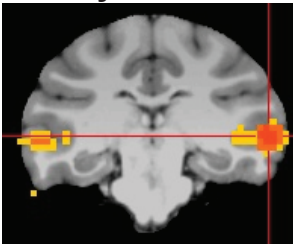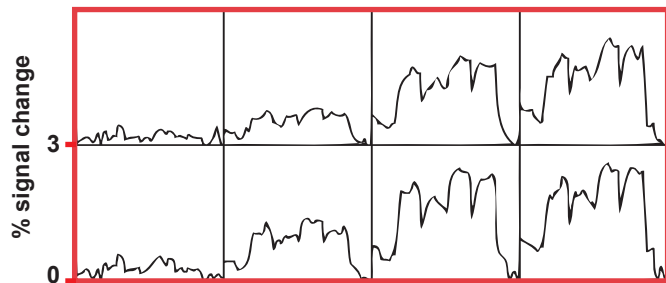

Monkey B

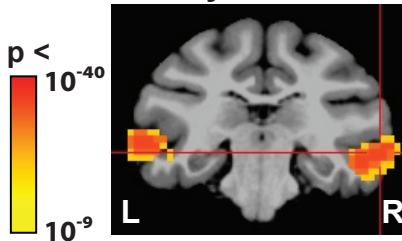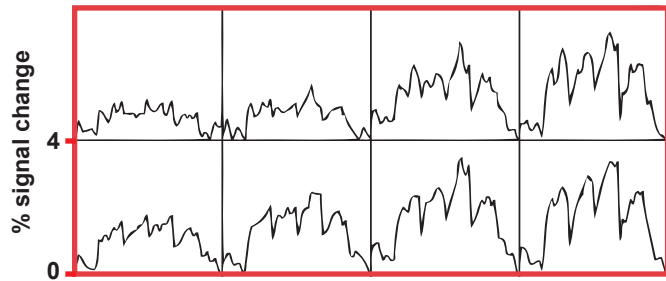

Supplement: pnas_0800489105_2.pdf [file pnas_0800489105_2.pdf]

Monkey E

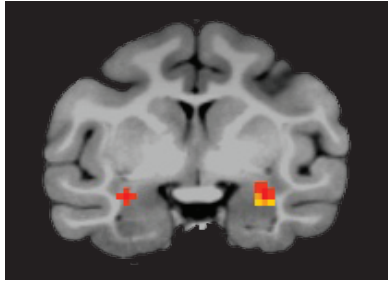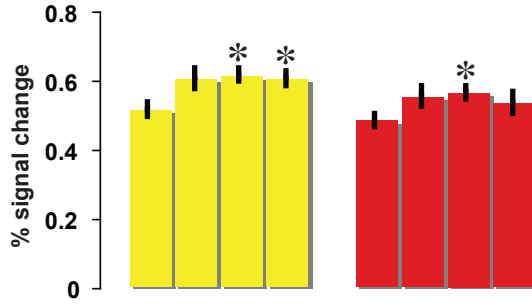

Monkey R

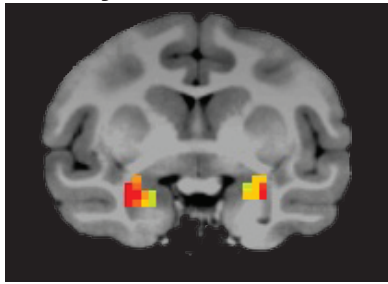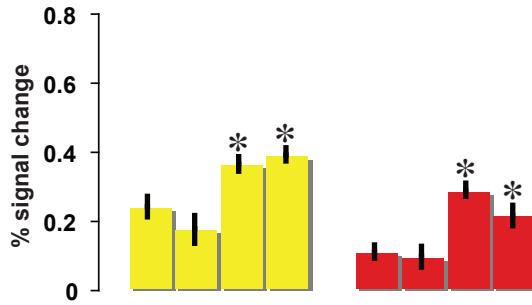

Monkey B

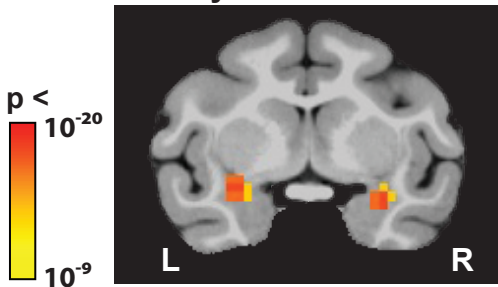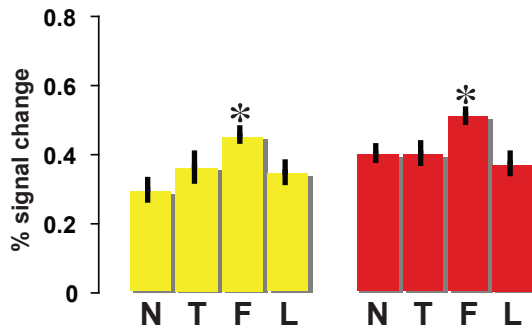

Supplement: pnas_0800489105_3.pdf [file pnas_0800489105_3.pdf]
